# Supplementary material for: Metastable β-Bi2O3 Nanoparticles with Potential for Photocatalytic Water Purification Using Visible Light Irradiation
Source: PubMed Central journal article supplement (PMC3775521; doi:10.1002/open.201300013), 2013-07-02
Supplement: open0002-0146-SD1.pdf [file open0002-0146-SD1.pdf]

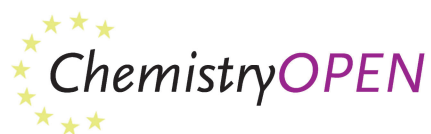

## Supporting Information

© 2013 The Authors. Published by Wiley-VCH Verlag GmbH & Co. KGaA, Weinheim

### **Metastable $\beta$ -Bi<sub>2</sub>O<sub>3</sub> Nanoparticles with Potential for Photocatalytic Water Purification Using Visible Light Irradiation**

Maik Schlesinger,<sup>[a]</sup> Marcus Weber,<sup>[a]</sup> Steffen Schulze,<sup>[b]</sup> Michael Hietschold,<sup>[b]</sup> and Michael Mehring<sup>\*[a]</sup>

open\_201300013\_sm\_miscellaneous\_information.pdf

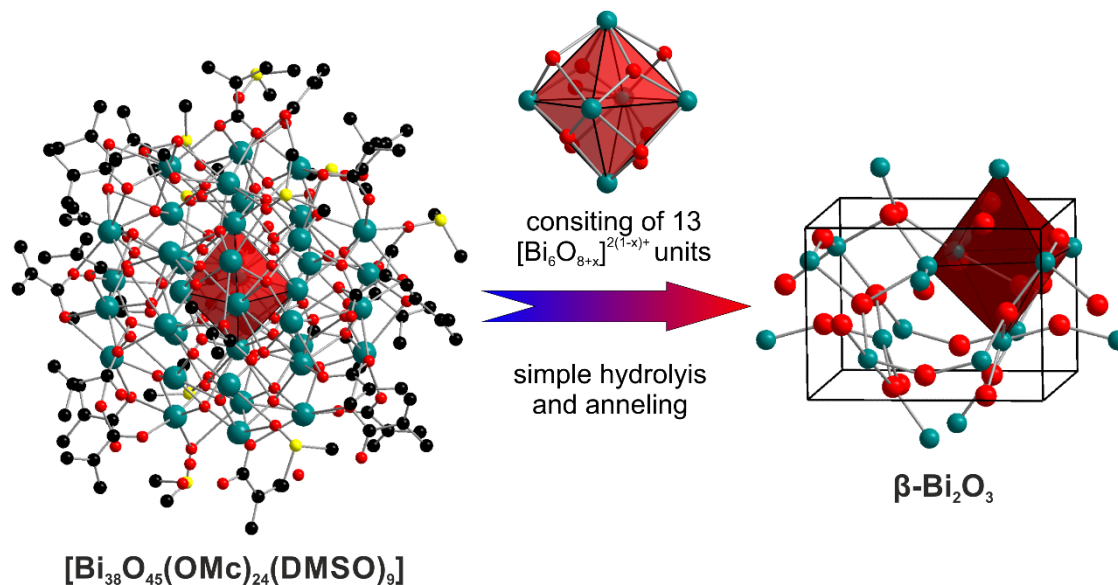

**Figure S1.** Structural relationship between  $[\text{Bi}_{38}\text{O}_{45}(\text{OMc})_{24}(\text{DMSO})_9] \cdot 2\text{DMSO} \cdot 7\text{H}_2\text{O}$  and  $\beta\text{-Bi}_2\text{O}_3$ . The bismuth oxido cluster as well as  $\beta\text{-Bi}_2\text{O}_3$  are composed of different numbers of the highlighted  $[\text{Bi}_6\text{O}_{8-x}]^{2(1+x)+}$  motif. Extension of this structural motif to an infinite network based on such edge-sharing  $[\text{Bi}_6\text{O}_{8-x}]^{2(1+x)+}$  units results in a nearly face centered cubic packing of the bismuth atoms similar to the structure of  $\beta\text{-Bi}_2\text{O}_3$ .

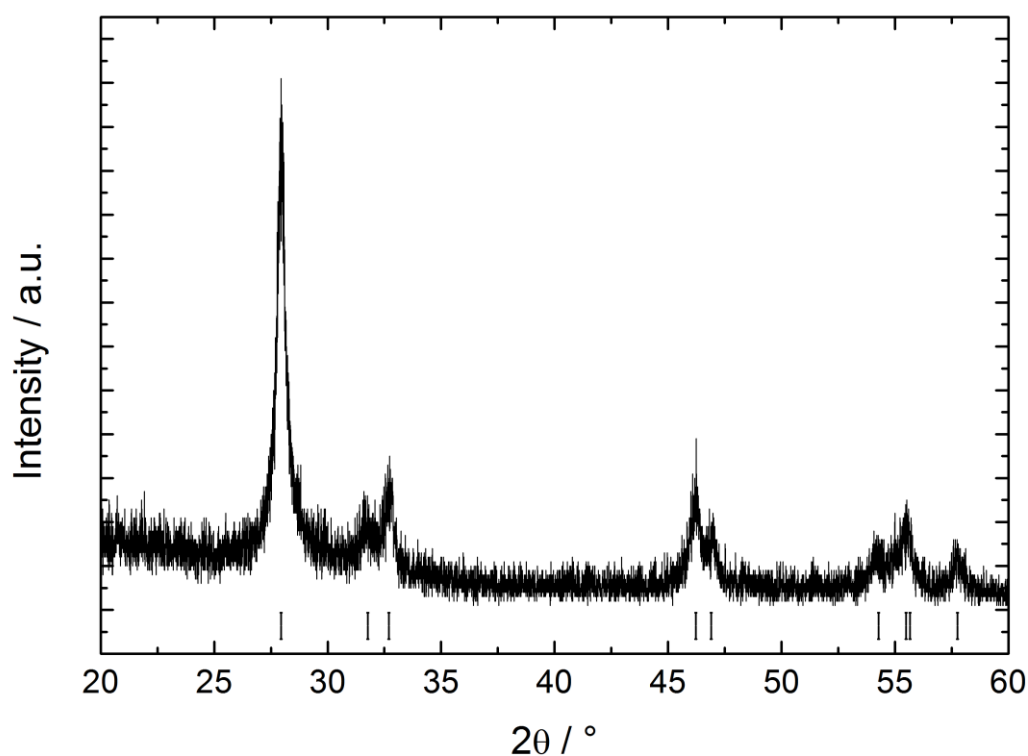

**Figure S2.** PXRD pattern of  $\beta\text{-Bi}_2\text{O}_3\text{-5}$  (reference:  $\beta\text{-Bi}_2\text{O}_3$ , ICDD 00-027-0050).

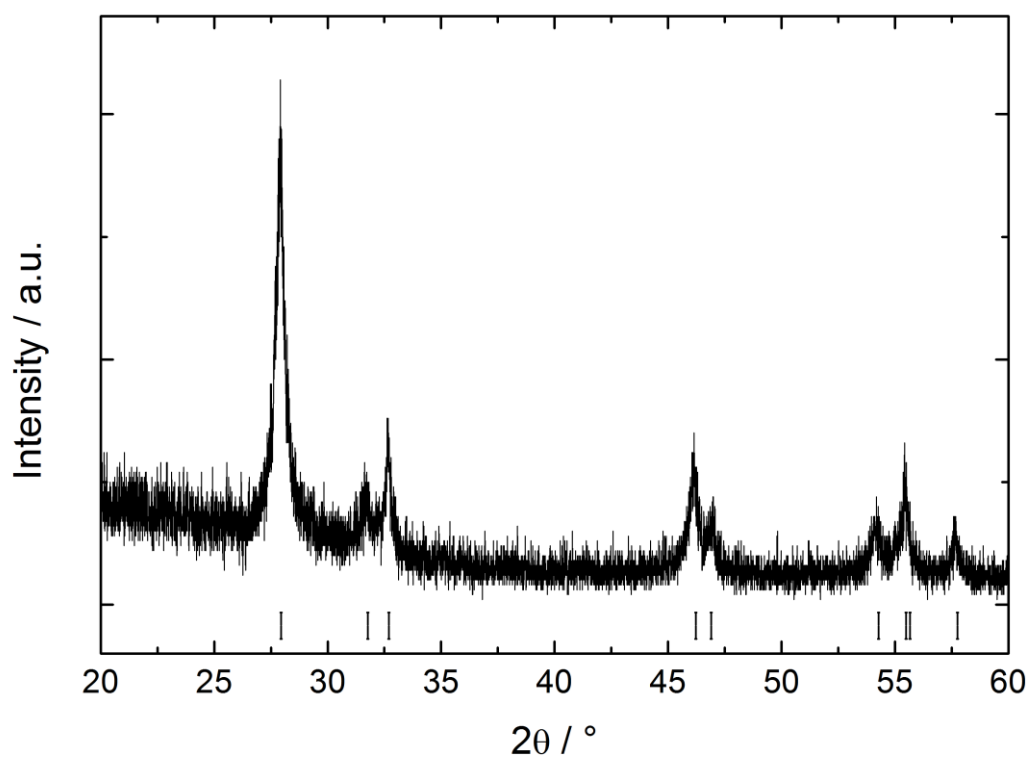

**Figure S3.** PXRD pattern of  $\beta$ -Bi<sub>2</sub>O<sub>3</sub>-10 (reference:  $\beta$ -Bi<sub>2</sub>O<sub>3</sub>, ICDD 00-027-0050).

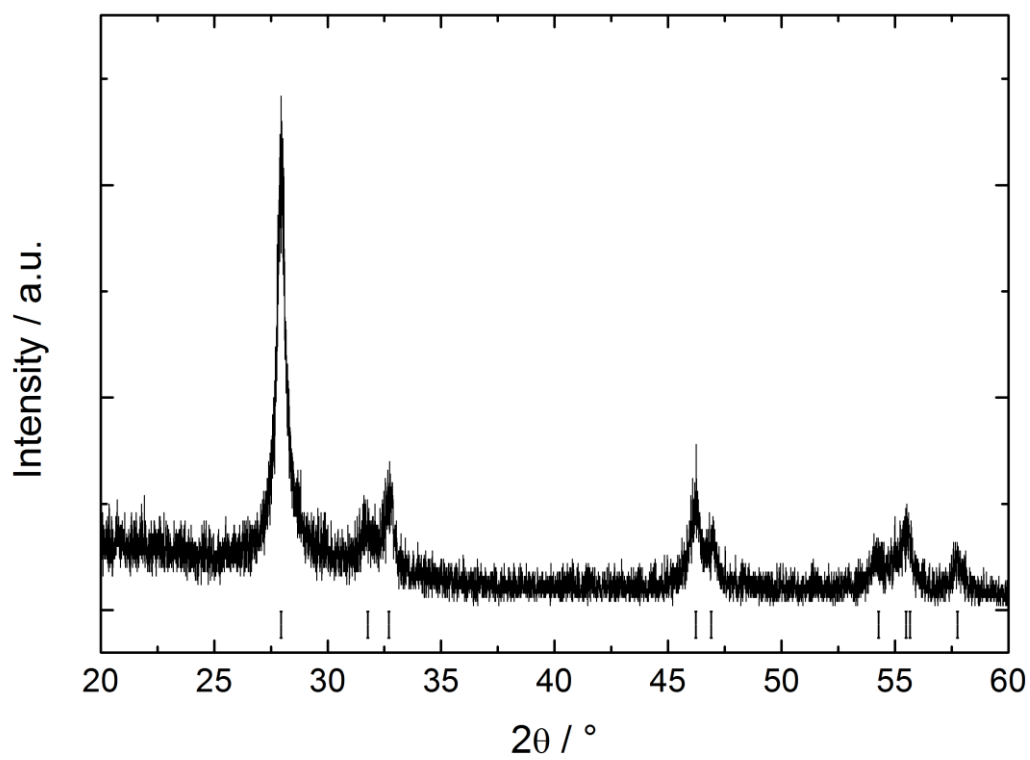

**Figure S4.** PXRD pattern of  $\beta$ -Bi<sub>2</sub>O<sub>3</sub>-30 (reference:  $\beta$ -Bi<sub>2</sub>O<sub>3</sub>, ICDD 00-027-0050).

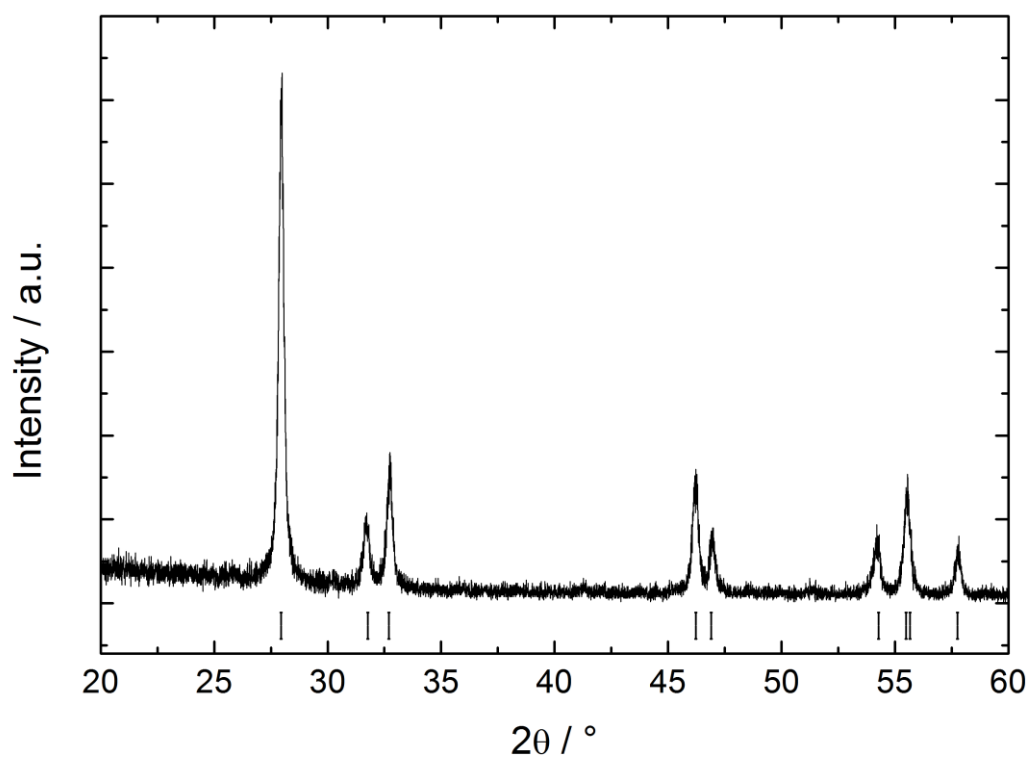

**Figure S5.** PXRD pattern of  $\beta\text{-Bi}_2\text{O}_3\text{-120}$  (reference:  $\beta\text{-Bi}_2\text{O}_3$ , ICDD 00-027-0050).

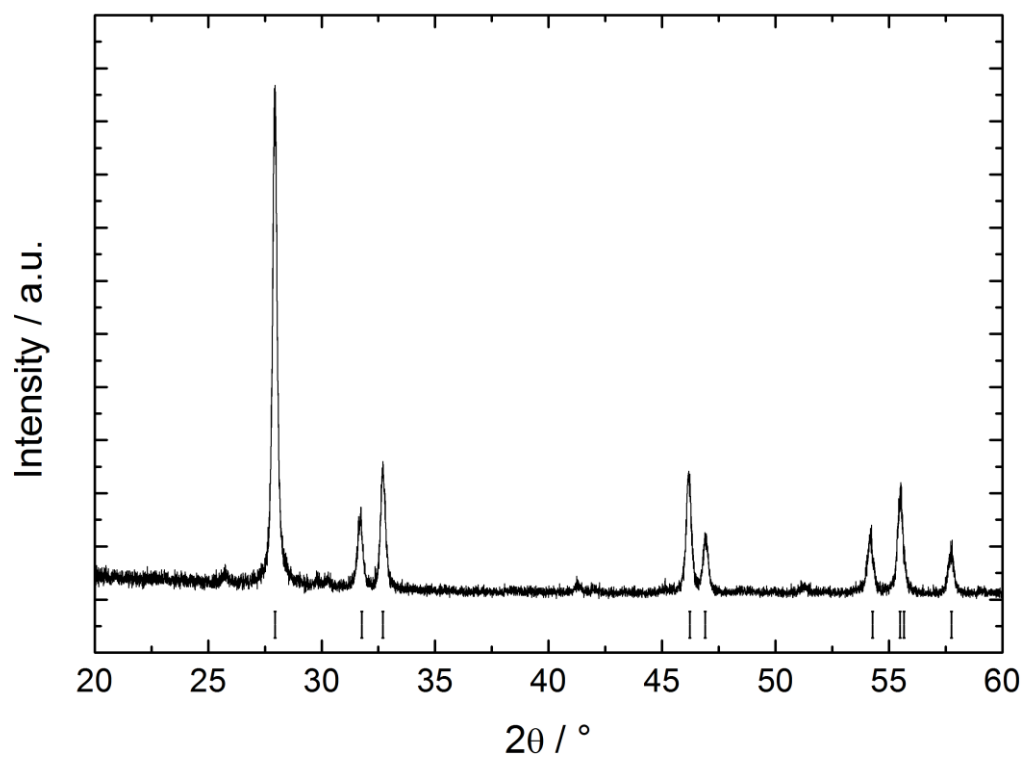

**Figure S6.** PXRD pattern of  $\beta\text{-Bi}_2\text{O}_3\text{-180}$  (reference:  $\beta\text{-Bi}_2\text{O}_3$ , ICDD 00-027-0050).

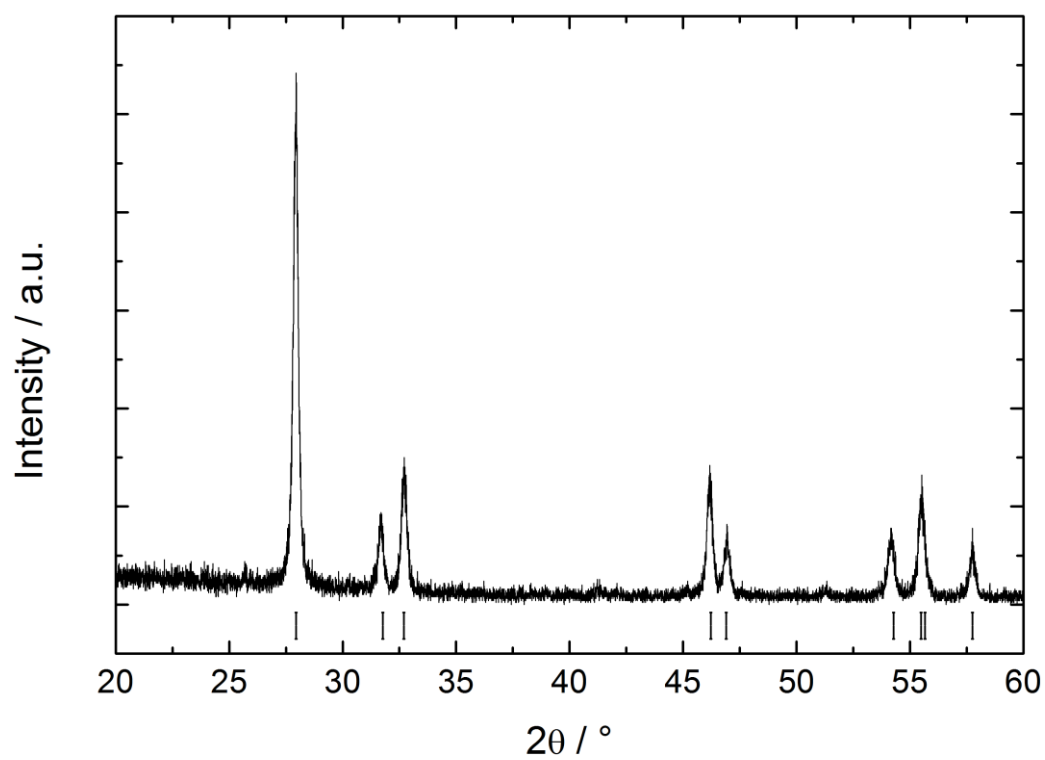

**Figure S7.** PXRD pattern of  $\beta\text{-Bi}_2\text{O}_3\text{-240}$  (reference:  $\beta\text{-Bi}_2\text{O}_3$ , ICDD 00-027-0050).

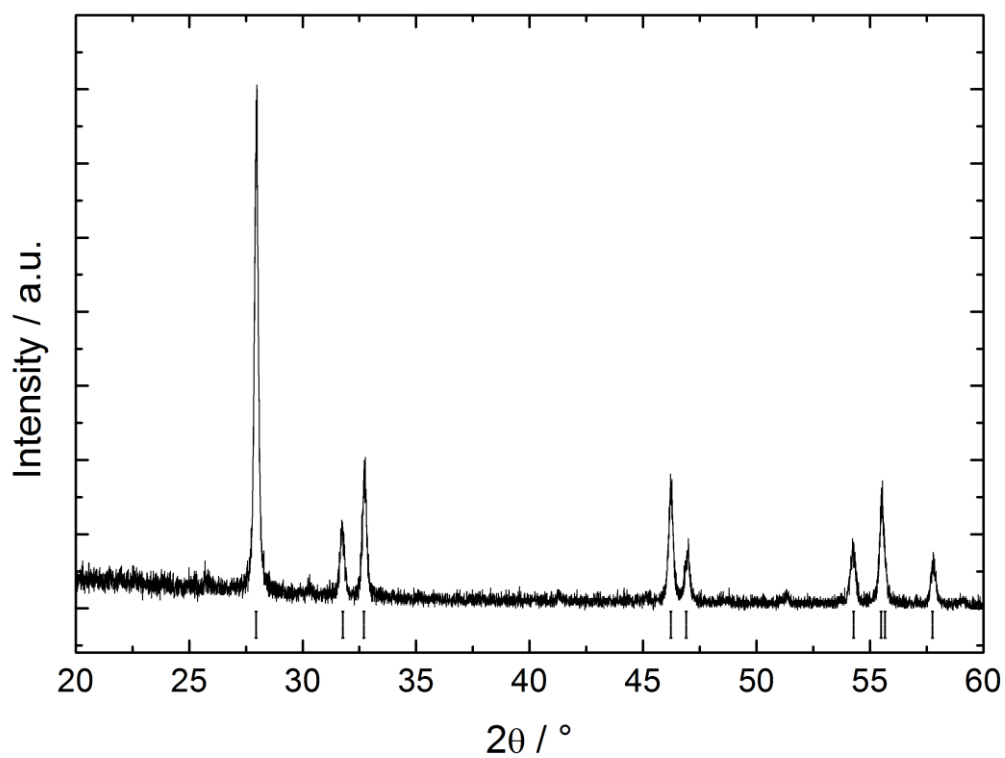

**Figure S8.** PXRD pattern of  $\beta\text{-Bi}_2\text{O}_3\text{-300}$  (reference:  $\beta\text{-Bi}_2\text{O}_3$ , ICDD 00-027-0050).

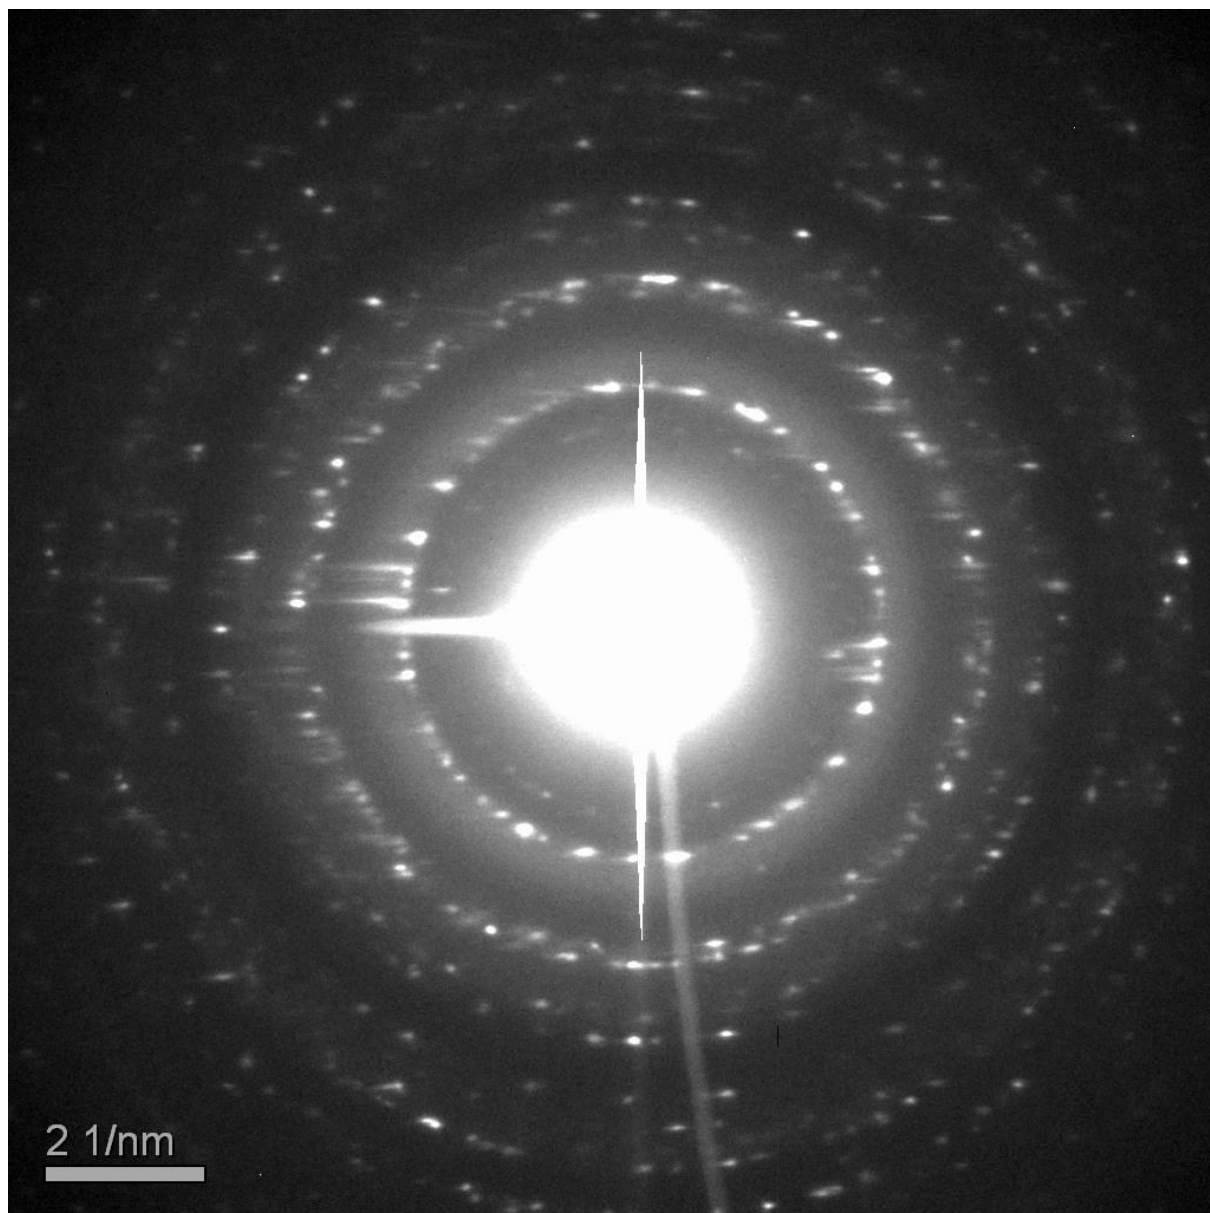

**Figure S9.** Electron diffraction image of sample  $\beta\text{-Bi}_2\text{O}_3\text{-5}$  that confirms the formation of the  $\beta\text{-Bi}_2\text{O}_3$  polymorph.

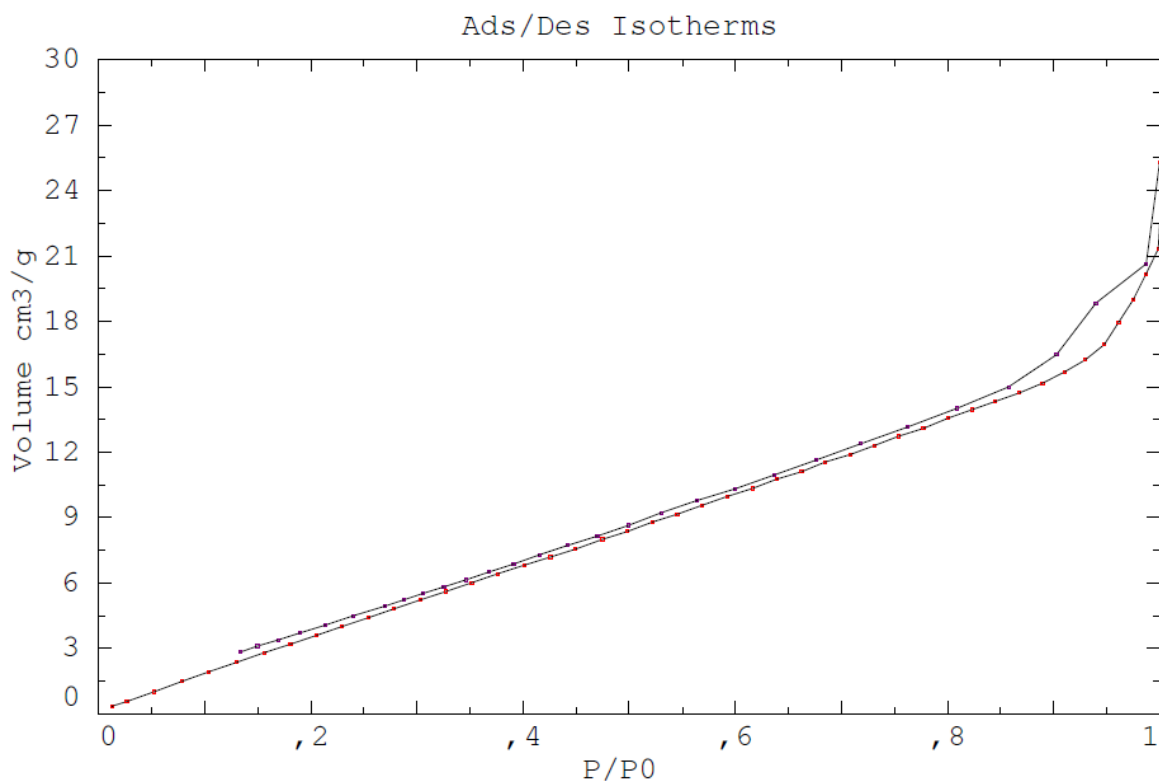

**Figure S10.** Nitrogen adsorption / desorption isotherm of sample  $\beta\text{-Bi}_2\text{O}_3\text{-5}$ .

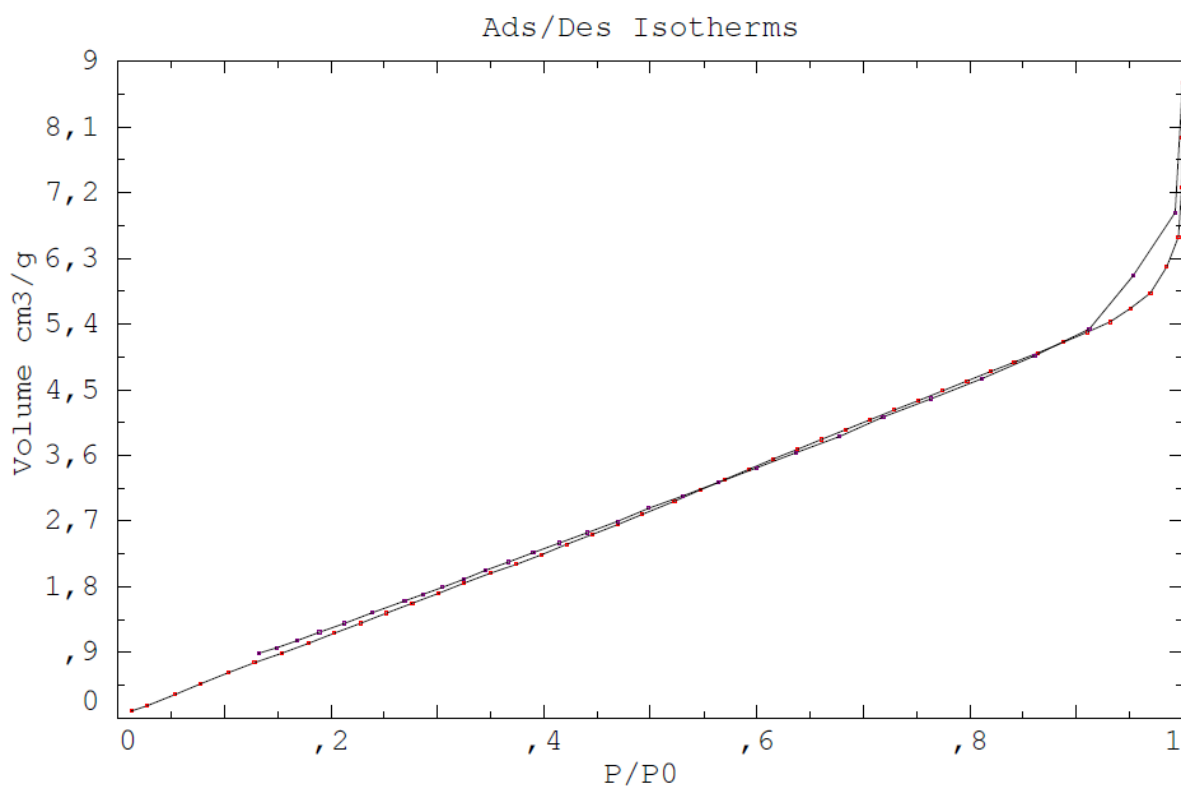

**Figure S11.** Nitrogen adsorption / desorption isotherm of sample  $\beta\text{-Bi}_2\text{O}_3\text{-300}$ .

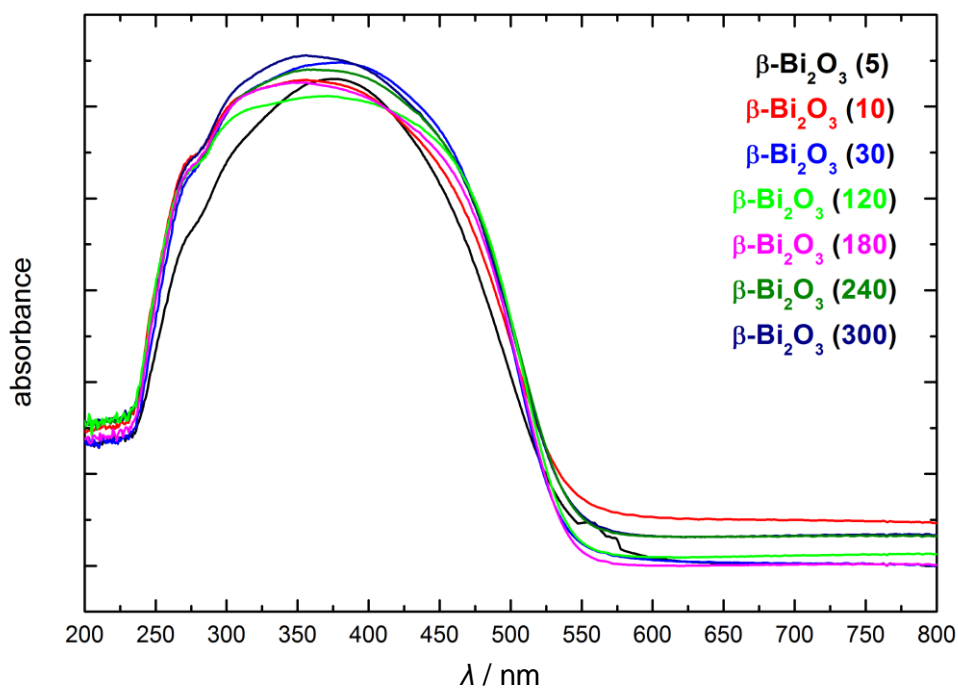

**Figure S12.** UV-Vis diffuse reflectance spectra of all investigated samples.

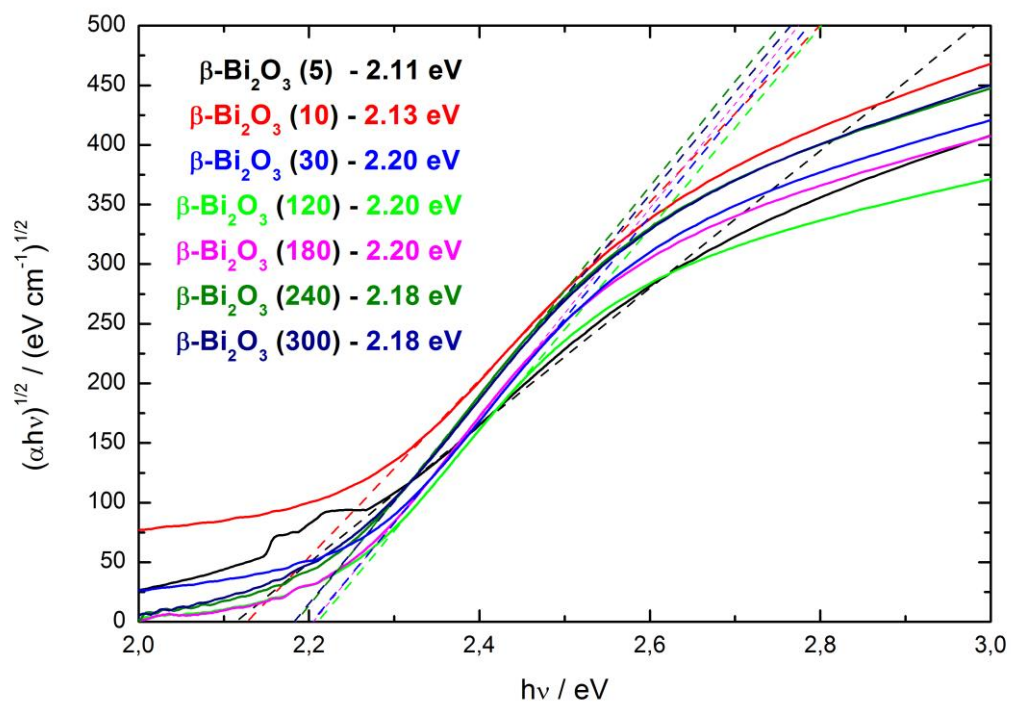

**Figure S13.** A plot of  $(\alpha hu)^{1/2}$  vs.  $hu$  (right) for all investigated samples (indirect band gap).



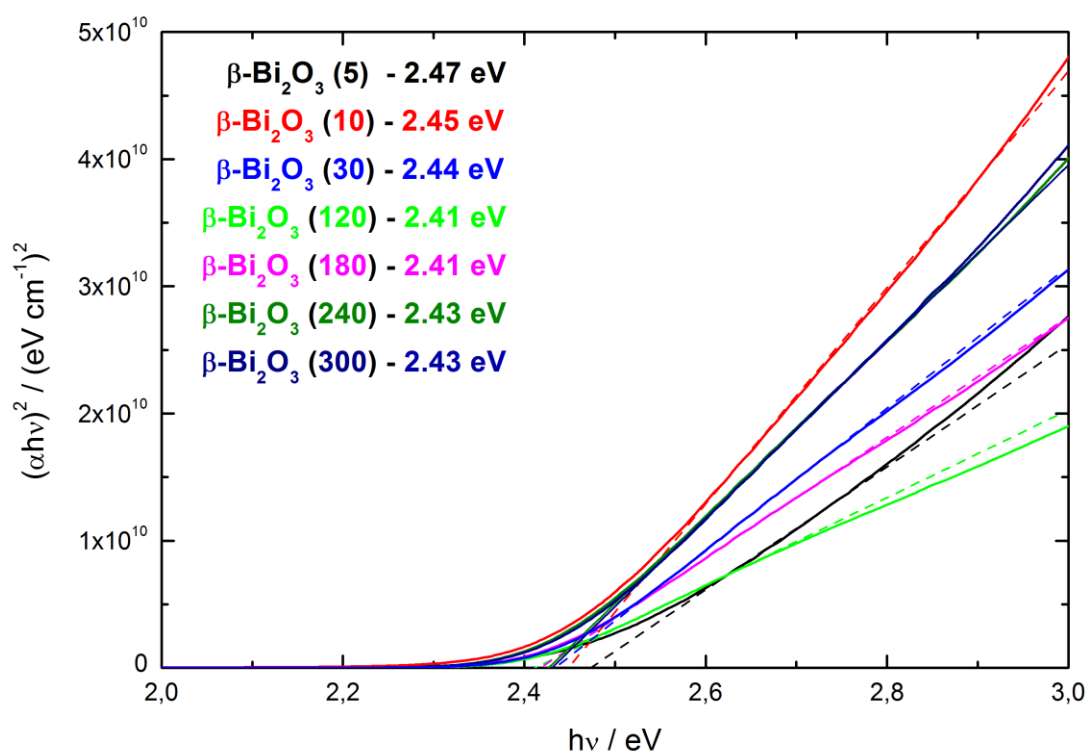

**Figure S14.** A plot of  $(\alpha h\nu)^2$  vs.  $h\nu$  (right) for all investigated samples (direct band gap).

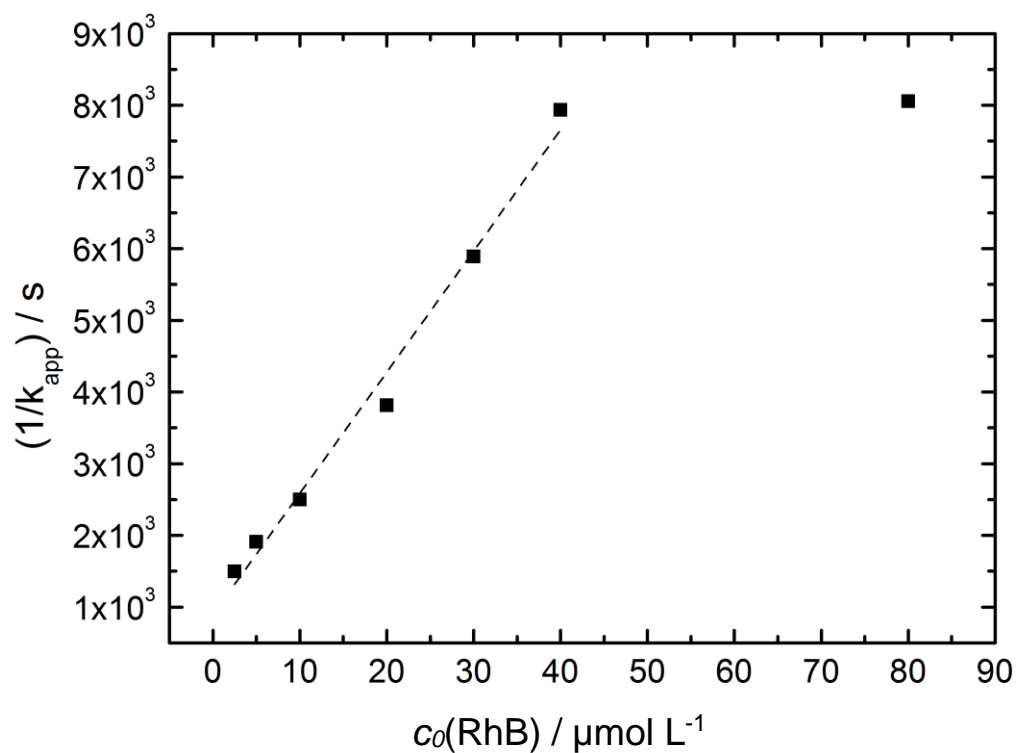

**Figure S15.** Reciprocal of the apparent rate constant vs. initial RhB concentration.

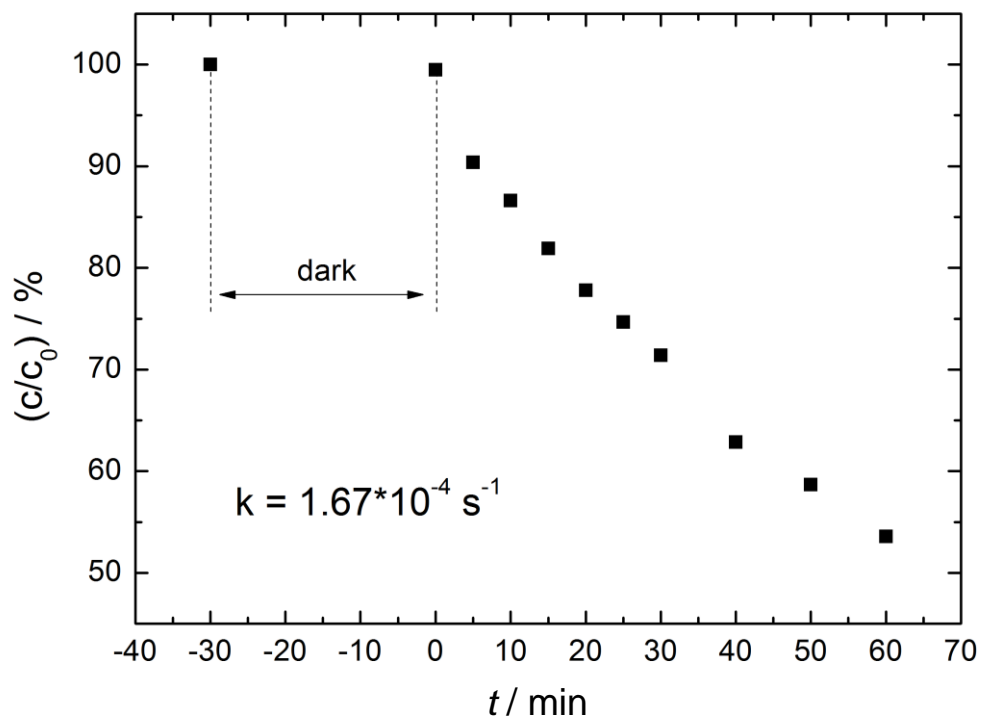

**Figure S16.** Time dependent conversion of the photodegradation of an aqueous RhB solution ( $10^{-5}$  M) under visible light irradiation ( $t > 0$  min) using  $\text{Bi}_2\text{O}_2\text{CO}_3$  nanoparticles as photocatalyst in several runs.  $t < 0$  min shows the adsorption behavior of the  $\text{Bi}_2\text{O}_2\text{CO}_3$  nanoparticles towards RhB.

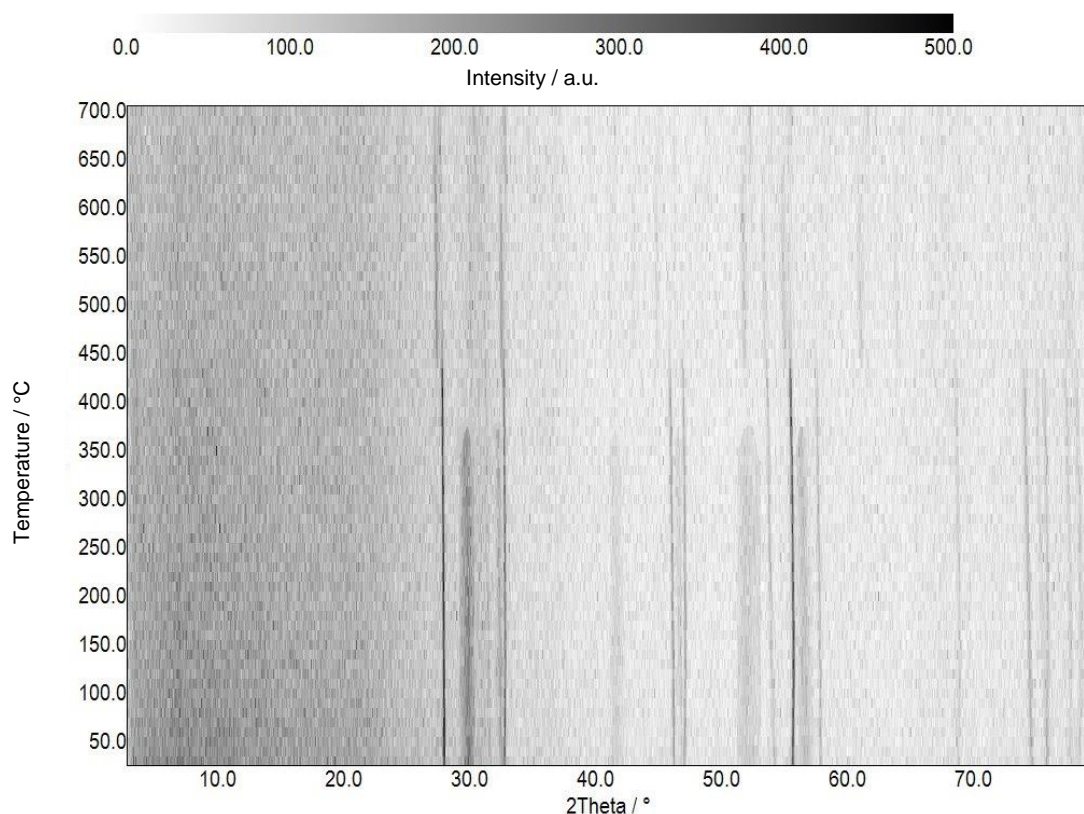

**Figure S17.** Temperature dependent powder X-ray diffraction experiment at  $\beta$ - $\text{Bi}_2\text{O}_3$ -10 which was used in ten photocatalytic cycles.

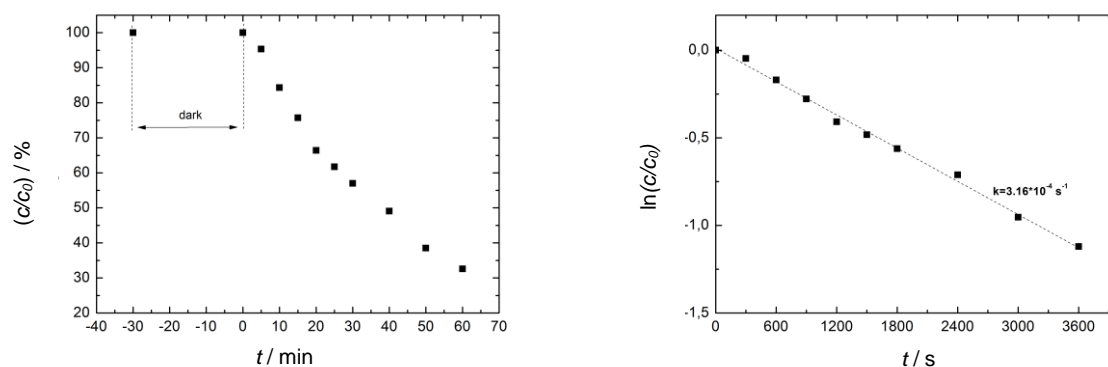

**Figure S18.** Time dependent conversion (*left*) and semilogarithmic plots (*right*) of the photodegradation of an aqueous RhB solution ( $10^{-5}$  M) under visible light ( $t > 0$  min) using recycled  $\beta$ - $\text{Bi}_2\text{O}_3$  as photocatalyst.  $t < 0$  min shows the adsorption behavior of the  $\beta$ - $\text{Bi}_2\text{O}_3$  nanoparticles towards RhB.

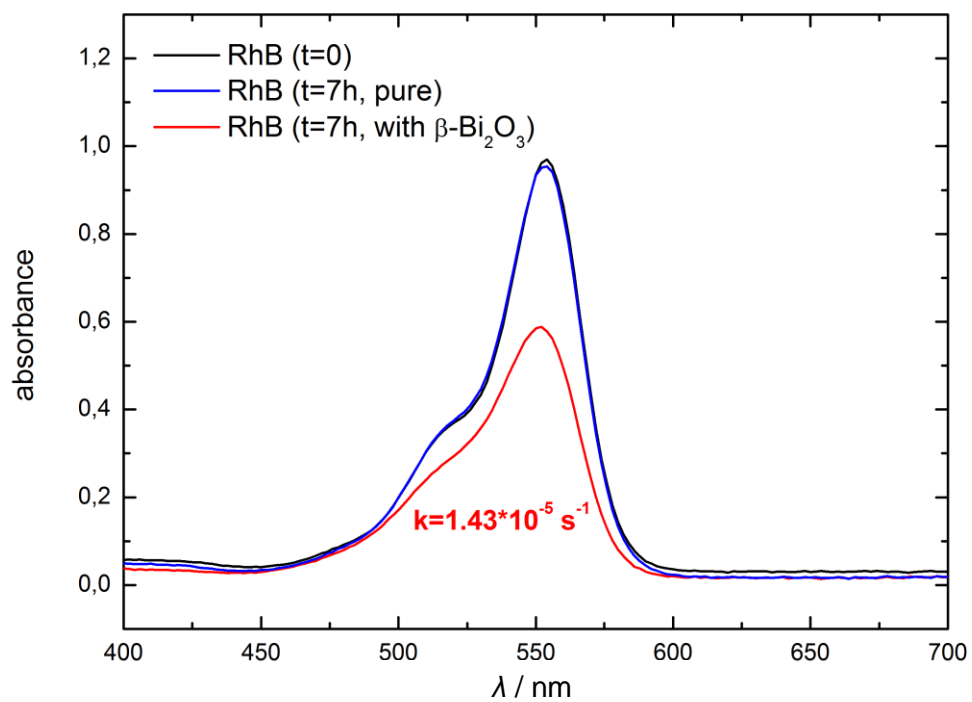

**Figure S19.** Photocatalytic degradation of RhB ( $10^{-5}$  M, 10 mL) without and with addition of 5 mg  $\beta\text{-Bi}_2\text{O}_3$ -10 using sun light (period: 7h).
